# Supplementary material for: Size-dependent ice nucleation by airborne particles during dust events in the eastern Mediterranean
Source: Copernicus journal article supplement (doi:10.5194/acp-19-11143-2019), 2019-09-03
Supplement: Supplementary file 1 [file acp-19-11143-2019-supplement.pdf]

Supplement of Atmos. Chem. Phys., 19, 11143–11158, 2019  
<https://doi.org/10.5194/acp-19-11143-2019-supplement>  
© Author(s) 2019. This work is distributed under  
the Creative Commons Attribution 4.0 License.

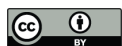

*Supplement of*

## **Size-dependent ice nucleation by airborne particles during dust events in the eastern Mediterranean**

**Naama Reicher et al.**

*Correspondence to:* Yinon Rudich ([yinon.rudich@weizmann.ac.il](mailto:yinon.rudich@weizmann.ac.il))

The copyright of individual parts of the supplement might differ from the CC BY 4.0 License.

1 **Figure S1: Maps of the average dust mass density ( $\text{kg m}^{-2}$ ) based on reanalysis data of MERRA-2. The**  
2 **analysis was focused in up to three days from the sampling period around the area of the sampling site (the**  
3 **blue marker). Darker shades represent higher amount of suspended dust. The maps, combined with the air**  
4 **mass backtrajectory analysis, used to trace the potential source of the dust storm, marked by the green**  
5 **arrows (see also green symbols in Figure 1 in the main text). The data was derived from the Giovanni**  
6 **website (<http://giovanni.sci.gsfc.nasa.gov/giovanni>).**  
7

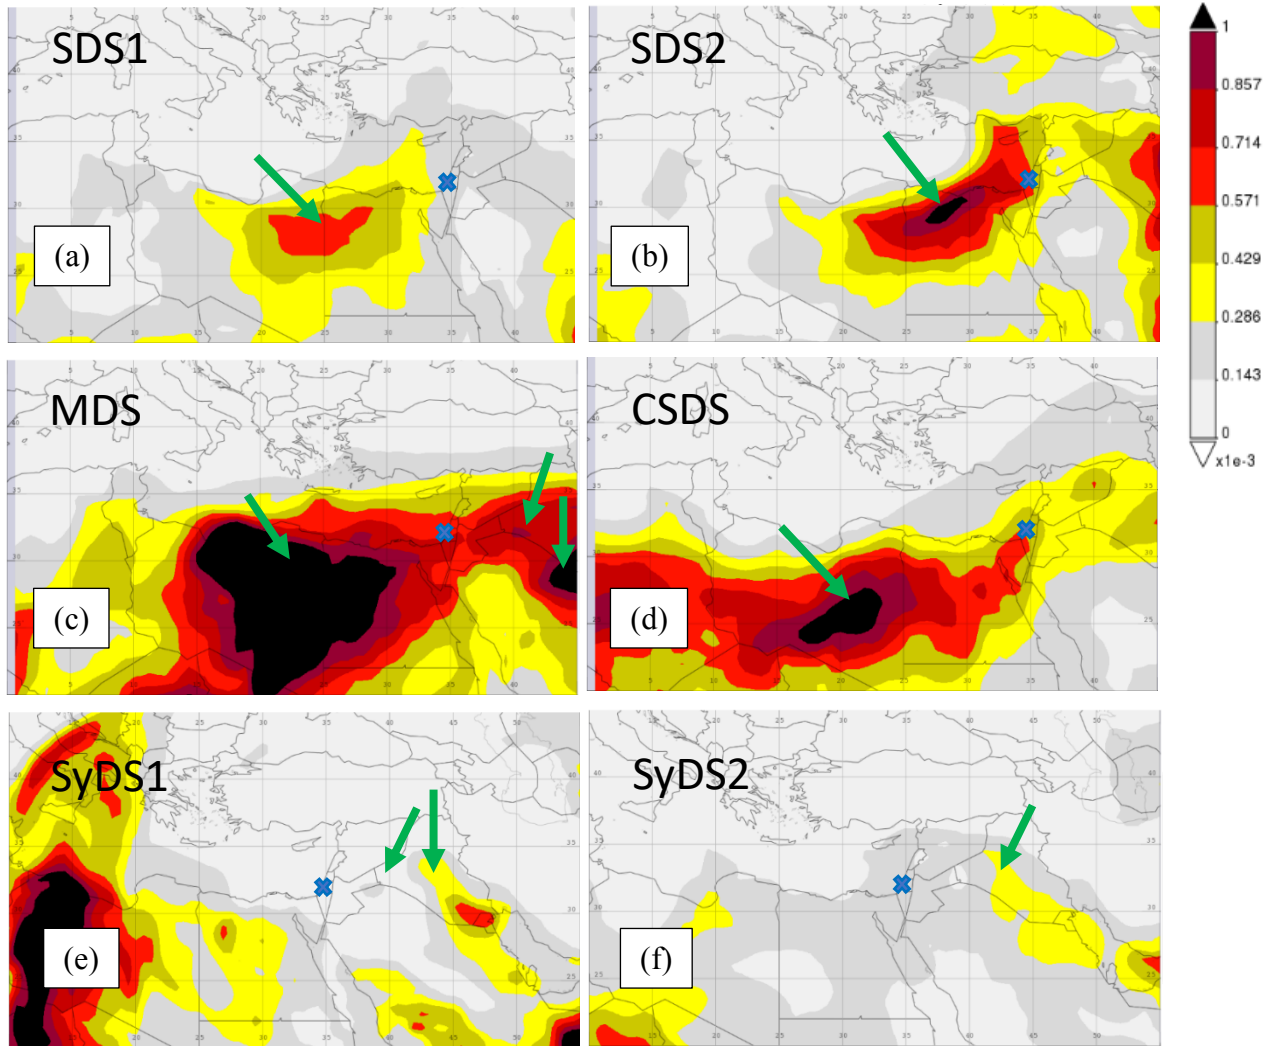

8  
9  
10  
11  
12  
13  
14  
15  
16  
17  
18  
19  
20  
21  
22  
23  
24

25 **Figure S2: Analysis of dust sources for cases where the observed suspended dust mass from MERRA did**  
26 **not overlap with the back trajectories analysis. Panel (a) shows air mass backward analysis for the MDS**  
27 **event (similarly to Figure 2) and a satellite image from “zoom earth” taken on 11 April 2017 AM, the day**  
28 **before the sampling started, and a dust plume over the Red Sea. Panel (b) shows the backward trajectory**  
29 **for CSDS and Satellite image from “zoom earth” taken on 26 April 2016 AM, the day before the sampling**  
30 **started, and a dust plume over the Eastern Mediterranean.**

31

32

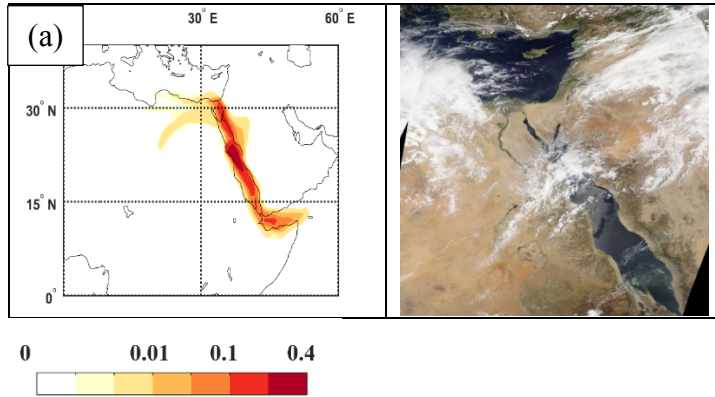

33

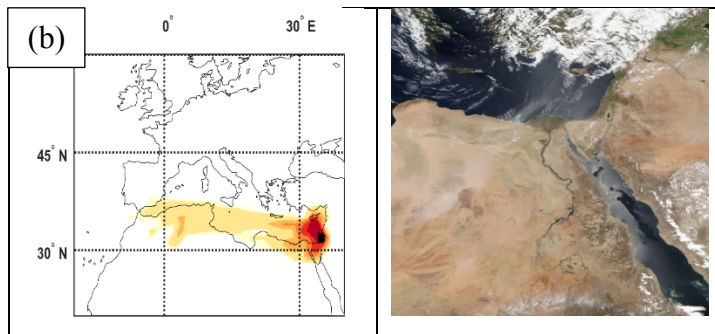

34

35

36

37

38

39

40

41

42

43

44

45

46

47

48

49

50

51

52

53

54

55

56

57

58 Figure S3: Super-aggregates particles covered the 0.3  $\mu\text{m}$  filter collected during SyDS2. EDX analysis  
59 showed that the particles were rich with potassium.  
60  
61  
62  
63

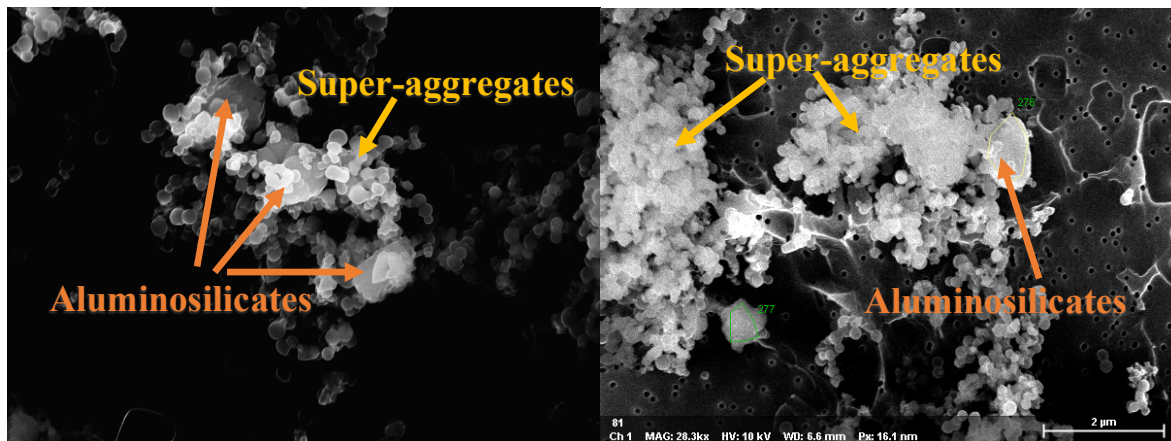

99 **Figure S4: Representative SEM micrographs of a filter that was collected in SDS1 event. The different**  
100 **color shading represents the different chemical elements that were indicated by EDX analysis. The filter**  
101 **was covered by particles with a common occurrence of Si and Al, suggesting that mineral dust was**  
102 **dominated. Some mineral dust particles were also rich in Ca and Mg, while S, Fe and K were mostly**  
103 **concentrated in specific particles. Occurrence of NaCl particles was also observed based on the coexistence**  
104 **of Na and Cl in the same particles.**

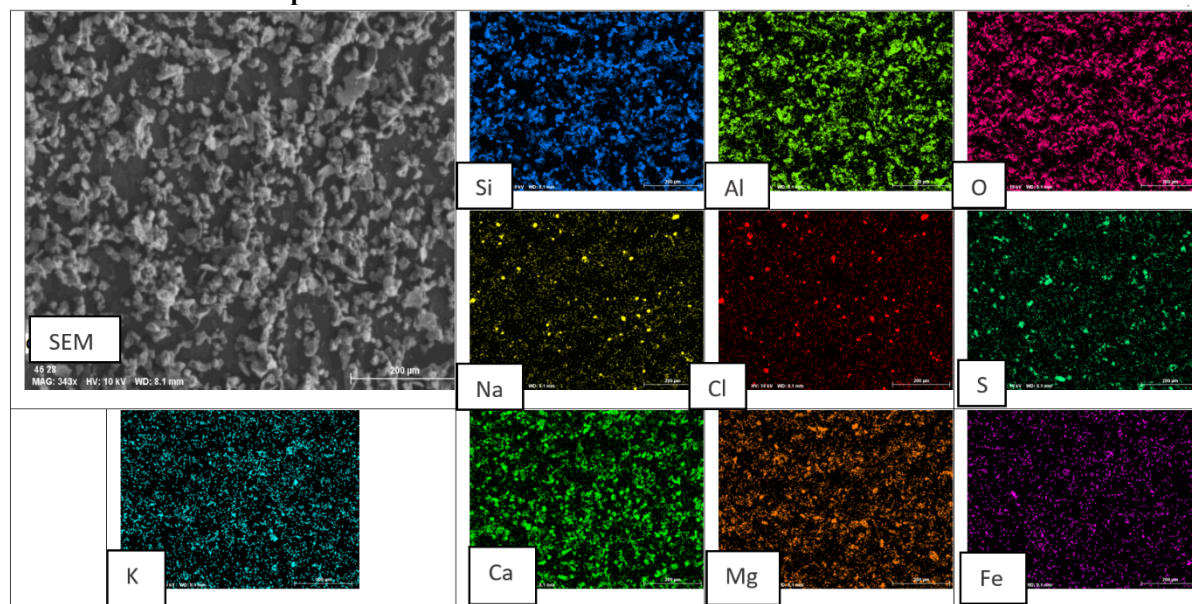

105

106

107

108

109

110

111

112

113

114

115

116

117

118

119

120

121

122

123

124

125

126

127

128

129

130

131

132

133

134 **Table S1: The expected percentage range of the chosen minerals in airborne particles. The values are based**  
135 **on values from Atkinson et al. (2013) and Boose et al. (2016) of transported mineral dust.**  
136

| <b>Mineral</b>        | <b>Atkinson et al. (2013)</b> | <b>Boose et al. (2016)</b> | <b>Used in this study</b> |
|-----------------------|-------------------------------|----------------------------|---------------------------|
| <b>K-feldspar</b>     | 1 – 25 %                      | 2.4 - 5.7 %                | 1 - 25%                   |
| <b>Na/Ca-feldspar</b> | 0.8 – 13.8 %                  | 3.1 – 7.6 %                | 0.8 – 13.8%               |
| <b>Quartz</b>         | 7 – 67 %                      | 13.6 – 24.1                | 7 – 67%                   |

137  
138  
139  
140  
141  
142  
143  
144  
145  
146  
147  
148  
149  
150  
151  
152  
153  
154  
155  
156  
157  
158  
159  
160  
161  
162  
163  
164  
165  
166  
167  
168  
169  
170  
171  
172  
173  
174  
175  
176  
177  
178

179  
180  
181  
182

**Figure S5: Average cumulative concentrations ( $K(T)$ ) of the background impurities (grey data; blank filter) in the (a) BINARY and (b) WISDOM setups compared to the averaged cumulative ice nuclei concentrations obtained from the airborne samples for the different size-classes (purple and yellow data).**

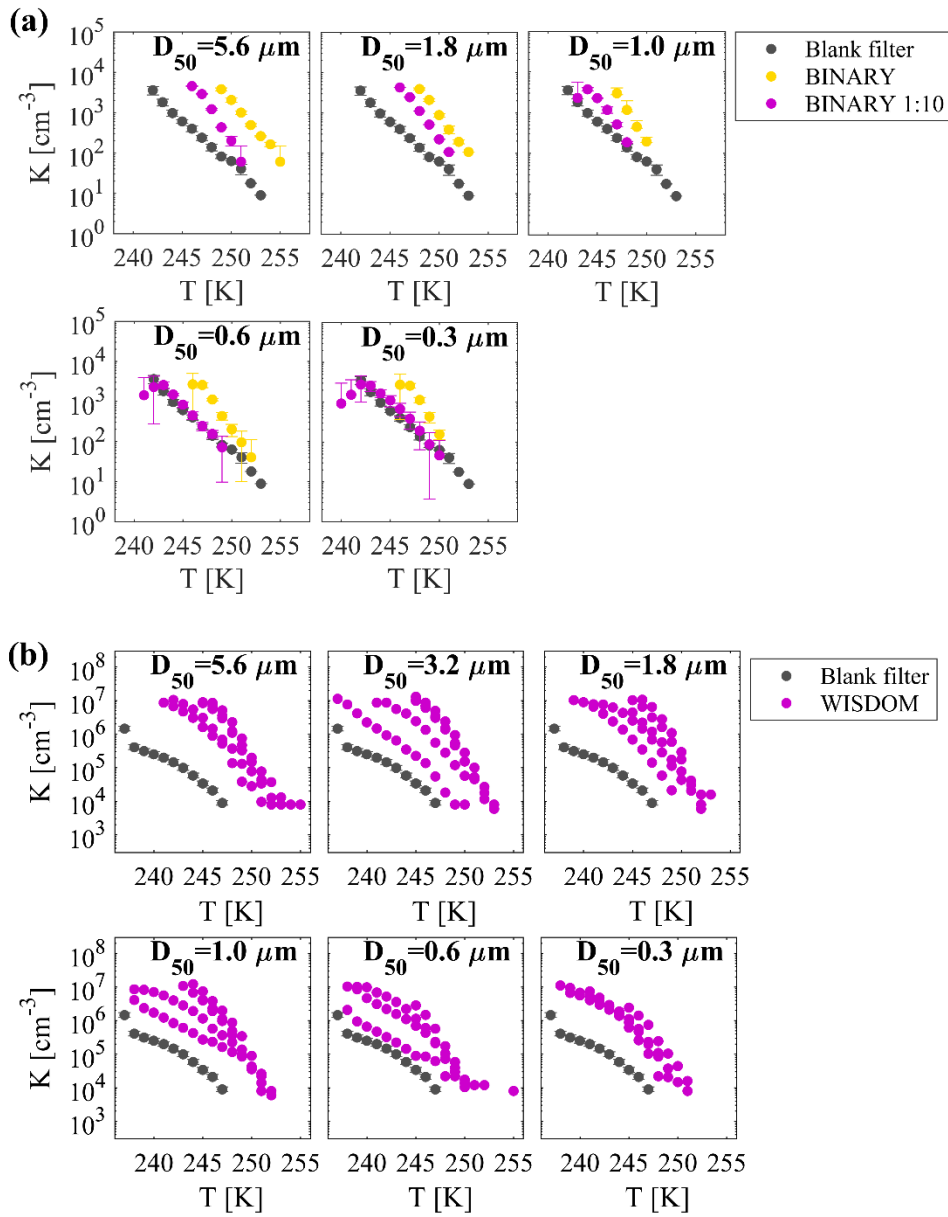

183  
184  
185  
186  
187  
188  
189  
190  
191  
192  
193  
194  
195  
196

197  
198  
199

**Table S2. Parameterization coefficients (95% confidence bounds) for each size class of each event, for the relation:  $n_s(T) = \exp[y_0 + a/(b + \exp[(T - 248)/c])]$  [ $m^{-2}$ ].**

|                                          | $D_{50}$<br>[ $\mu\text{m}$ ] | coefficients                                                                                                                | $R^2$ | Valid T<br>range<br>[K] |
|------------------------------------------|-------------------------------|-----------------------------------------------------------------------------------------------------------------------------|-------|-------------------------|
| Supermicron<br>class dusty<br>atmosphere | 5.6                           | $y_0 = 10.98$ (10.86, 11.11)<br>$a = 28.63$ (22.66, 34.59)<br>$b = 1.424$ (0.9445, 1.904)<br>$c = 5.815$ (4.736, 6.893)     | 0.96  | [242,255]               |
|                                          | 3.2                           | $y_0 = 10.99$ (10.9, 11.08)<br>$a = 36.65$ (32.97, 40.32)<br>$b = 2.533$ (2.214, 2.851)<br>$c = 3.234$ (2.941, 3.527)       | 0.985 | [242,253]               |
|                                          | 1.8                           | $y_0 = 10.99$ (10.9, 11.08)<br>$a = 36.65$ (32.97, 40.32)<br>$b = 2.533$ (2.214, 2.851)<br>$c = 3.234$ (2.941, 3.527)       | 0.985 | [241,253]               |
|                                          | 1.0                           | $y_0 = 10.97$ (9.843, 12.09)<br>$a = 26.69$ (21.55, 31.82)<br>$b = 1.895$ (1.407, 2.383)<br>$c = 3.417$ (2.601, 4.234)      | 0.883 | [238,252]               |
| Submicron<br>class dusty<br>atmosphere   | 0.6                           | $y_0 = 215.79$ (14.84, 16.75)<br>$a = 6.229$ (3.368, 9.089)<br>$b = 0.7726$ (0.5114, 1.034)<br>$c = 2.09$ (1.477, 2.703)    | 0.932 | [238,255]               |
|                                          | 0.3                           | $y_0 = 15.46$ (12.94, 17.98)<br>$a = 5.148$ (-1.583, 11.88)<br>$b = 0.7357$ (0.06841, 1.403)<br>$c = 2.016$ (0.8725, 3.161) | 0.862 | [238,251]               |

200
